# Supplementary material for: The effects of framework dynamics on the behavior of water adsorbed in the [Zn(l-L)(Cl)] and Co-MOF-74 metal–organic frameworks
Source: Royal Society of Chemistry journal article supplement (doi:10.1039/c5cp07681a), 2016-01-01
Supplement: c5cp07681a1.pdf [file c5cp07681a1.pdf]

## Supplementary Information

### The Effects of Framework Dynamics on the Behavior of Water Adsorbed in the [Zn(*l*-L)(Cl)] and Co-MOF-74 Metal-Organic Frameworks

Zachary L. Terranova and Francesco Paesani

Department of Chemistry and Biochemistry, University of California, San Diego  
La Jolla, CA 92093

#### 1 [Zn(*l*-L)(Cl)]

##### 1.1 Water structure

Further insights into the spatial arrangement of the water molecules in [Zn(*l*-L)(Cl)] can be gained from the analysis of two- and three-dimensional water density distributions in the MOF pores shown in Figures S1-S4. As mentioned in the main text, the water molecules adsorbed in the [Zn(*l*-L)(Cl)] pores arrange in consecutive layers that are templated by the Zn<sup>2+</sup>/Cl<sup>-</sup> groups and propagate along the MOF channels, effectively forming one-dimensional hydrogen-bonded chains that follow the *l*-helicity of the framework. However, although the Zn–Cl groups correspond to the most favorable binding sites in both the flexible and the rigid framework, their interactions with the water molecules are clearly less specific in the latter case, resulting in more diffuse spatial distributions of water inside the pores.

N = 6

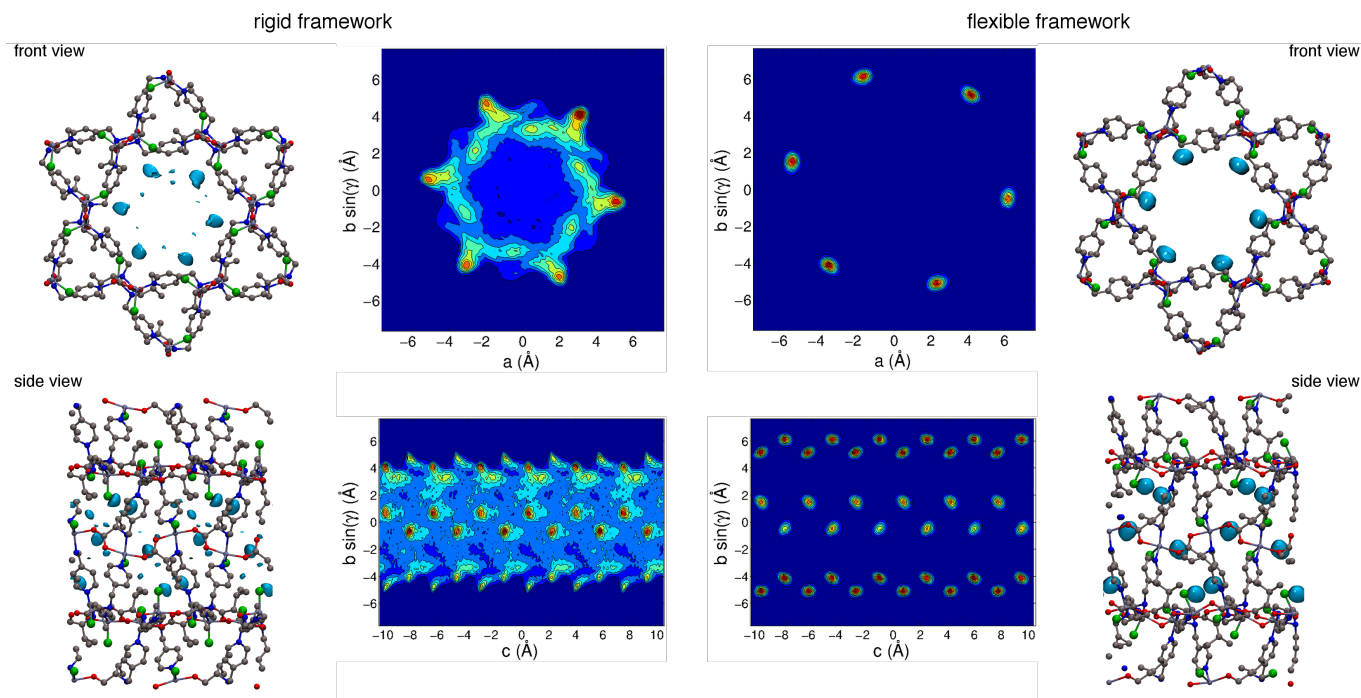

**Figure S1** Three- and two-dimensional density distributions of the water oxygen calculated for [Zn(*l*-L)(Cl)] using both a rigid (first two columns) and a flexible framework (last two columns) for N = 6 water molecules per pore. The top and bottom rows show front and side views of the MOF pores. H atoms are in white, C atoms are in dark gray, N atoms are in blue, O atoms are in red, Cl atoms are in green, and Zn atoms are light violet. The water densities (shown at an isosurface value of 0.16 Å<sup>-3</sup>) are in light blue.

N = 12

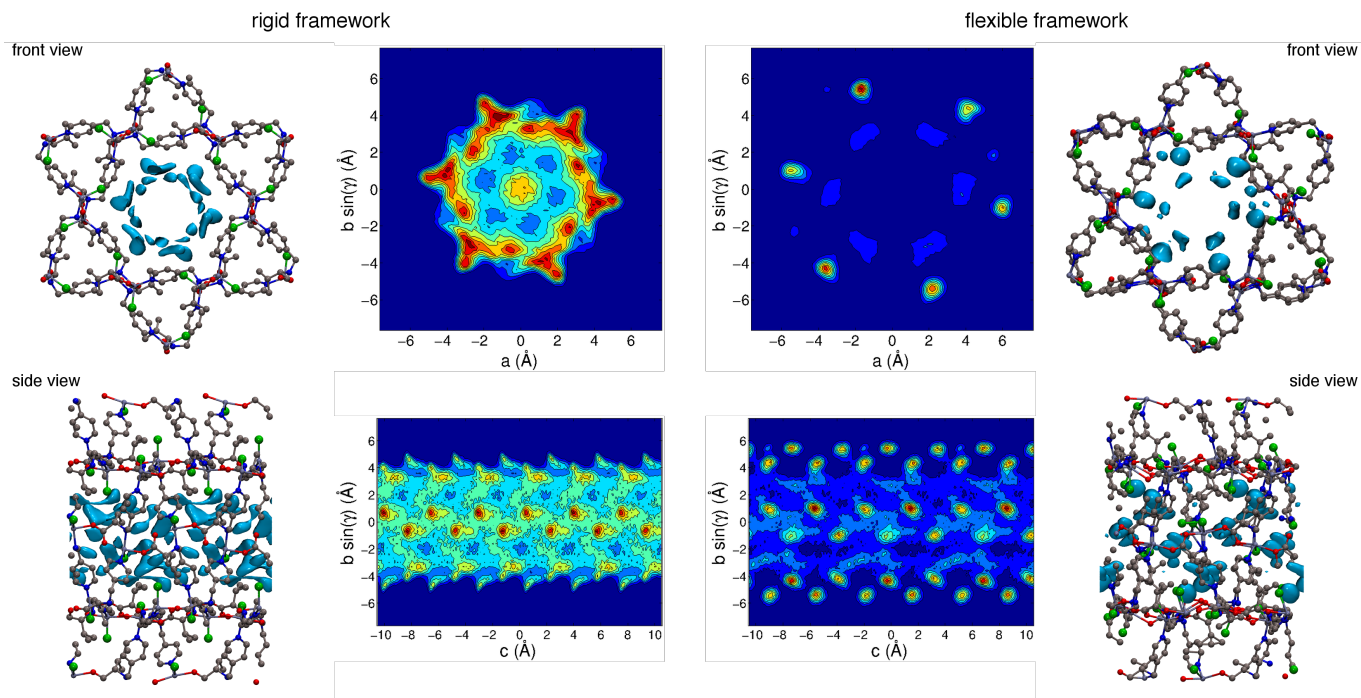

**Figure S2** Three- and two-dimensional density distributions of the water oxygen calculated for [Zn(I-L)(Cl)] using both a rigid (first two columns) and a flexible framework (last two columns) for N = 12 water molecules per pore. The top and bottom rows show front and side views of the MOF pores. H atoms are in white, C atoms are in dark gray, N atoms are in blue, O atoms are in red, Cl atoms are in green, and Zn atoms are light violet. The water densities (shown at an isosurface value of  $0.16 \text{ \AA}^{-3}$ ) are in light blue.

N = 18

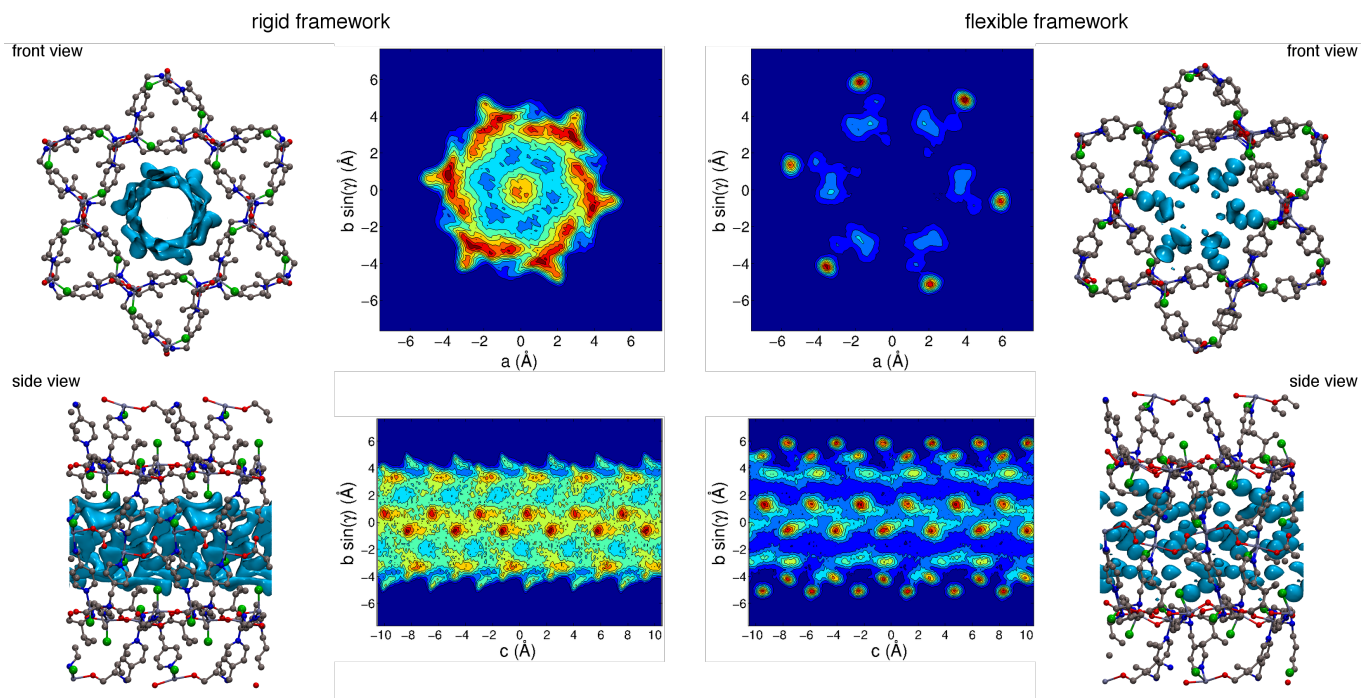

**Figure S3** Three- and two-dimensional density distributions of the water oxygen calculated for [Zn(I-L)(Cl)] using both a rigid (first two columns) and a flexible framework (last two columns) for N = 18 water molecules per pore. The top and bottom rows show front and side views of the MOF pores. H atoms are in white, C atoms are in dark gray, N atoms are in blue, O atoms are in red, Cl atoms are in green, and Zn atoms are light violet. The water densities (shown at an isosurface value of  $0.16 \text{ \AA}^{-3}$ ) are in light blue.

$$N = 24$$

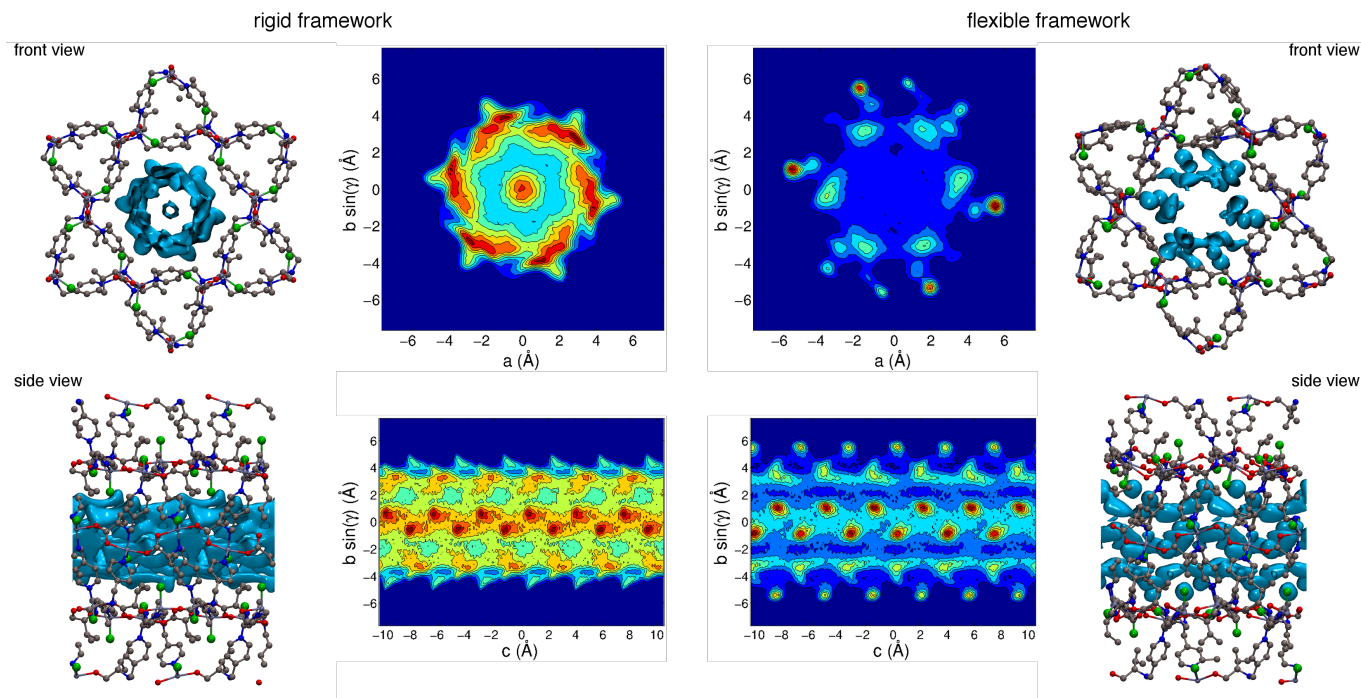

**Figure S4** Three- and two-dimensional density distributions of the water oxygen calculated for  $[\text{Zn}(\text{I-L})(\text{Cl})]$  using both a rigid (first two columns) and a flexible framework (last two columns) for  $N = 24$  water molecules per pore. The top and bottom rows show front and side views of the MOF pores. H atoms are in white, C atoms are in dark gray, N atoms are in blue, O atoms are in red, Cl atoms are in green, and Zn atoms are light violet. The water densities (shown at an isosurface value of  $0.16 \text{ \AA}^{-3}$ ) are in light blue.

## 1.2 Water orientational dynamics

The reorientation decay of  $C_2(t)$  was fitted to a tri-exponential function to gain quantitative insights into the hydrogen bonding dynamics of water adsorbed in  $[\text{Zn}(\text{I-L})(\text{Cl})]$ . While only the relevant  $\tau_2$  parameters are reported in the main text, all relaxation times are listed in Table S1 and S2.

**Table S1** Relaxation time constants,  $\tau_i$ , obtained from fits to orientational correlation functions  $C_2(t)$  calculated for water in flexible  $[\text{Zn}(\text{I-L})(\text{Cl})]$  as a function of number of  $\text{H}_2\text{O}$  molecules per pore.

| N  | $\tau_1$ (ps) | $\tau_2$ (ps) | $\tau_3$ (ps) |
|----|---------------|---------------|---------------|
| 2  | 0.0569        | 93.57         | >1000         |
| 4  | 0.0544        | 49.23         | 300.38        |
| 6  | 0.0497        | 99.62         | 750.99        |
| 8  | 0.0013        | 15.65         | 179.23        |
| 10 | 0.0021        | 24.49         | 216.62        |
| 12 | 0.0011        | 14.74         | 179.15        |
| 18 | 0.0026        | 16.23         | 210.41        |
| 24 | 0.0107        | 9.97          | 89.52         |

**Table S2** Relaxation time constants,  $\tau_i$ , obtained from fits to orientational correlation functions  $C_2(t)$  calculated for water in rigid [Zn(*l*-L)(Cl)] as a function of number of H<sub>2</sub>O molecules per pore.

| N  | $\tau_1$ (ps) | $\tau_2$ (ps) | $\tau_3$ (ps) |
|----|---------------|---------------|---------------|
| 2  | 0.029         | 8.63          | 160.72        |
| 4  | 0.138         | 6.82          | 88.16         |
| 6  | 0.129         | 4.70          | 35.06         |
| 8  | 0.132         | 3.52          | 21.19         |
| 10 | 0.156         | 4.38          | 22.77         |
| 12 | 0.121         | 2.84          | 13.99         |
| 18 | 0.119         | 3.14          | 15.52         |
| 24 | 0.167         | 5.45          | 22.24         |

## 2 Co-MOF-74

### 2.1 Force field development

For Co-MOF-74, parameterization of all bonds, angles, and dihedrals containing the Co centers were derived from a genetic algorithm fit to *ab initio* calculations carried out for the reduced molecular model shown in Figure S5. A representation of the underlying potential

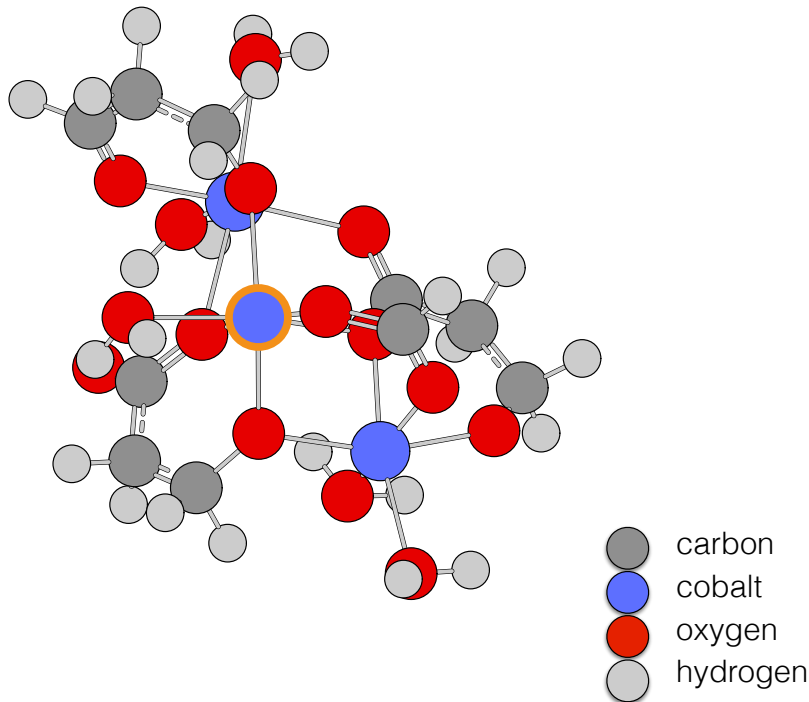

**Figure S5** Reduced molecular model for Co-MOF-74 where the carbon (dark grey), cobalt (periwinkle), oxygen (red), and hydrogen (light grey) atoms are shown. The cobalt atom that was displaced in the potential energy scans is highlighted in orange.

energy surface (PES) was obtained by displacing the central Co atom (colored orange) in three dimensions in increments of 0.05 Å for a total displacement of  $\pm 0.5$  Å from the crystal structure reference.<sup>1</sup> The force field parameters associated with bonds, angles, and dihedrals containing the Co centers were derived from fits to the calculated PES using a genetic algorithm.<sup>2</sup> As described in the main text, the force field parameters describing the intramolecular interactions within the dobdc linkers were taken from the General Amber Force Field (GAFF).<sup>3</sup> All force field parameters are listed in Tables 1-5.

The force field parameters describing the interaction of the water molecules with the Co atoms of the framework were obtained from a fit to a 1-dimensional potential energy scan performed using the molecular model of Figure S5 where one water molecule was incrementally moved away from the central Co atom. The calculated potential energy function was then fitted to the following analytical expression

$$U(r_{ij}) = A \exp^{-Br_{ij}} - \frac{C}{(D+r_{ij})^6} \quad (1)$$

where  $A = 45620.40 \text{ kcal mol}^{-1}$ ,  $B = 0.277128 \text{ Å}^{-1}$ ,  $C = 137171.00 \text{ kcal mol}^{-1} \text{ Å}^6$ , and  $D = 1.92618 \text{ Å}$ . As described in Figure S6,



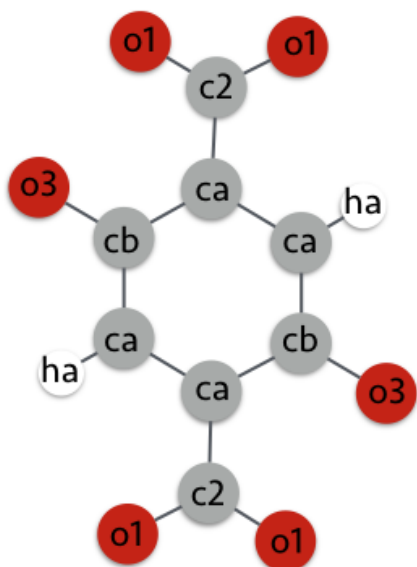

**Figure S6** Atom labels used in the definition of the force field parameters for Co-MOF-74 for the organic linker. See text for details.

the atom labels for the force field parameters are shown for 2,5-dioxido-1,4-benzenedicarboxylate. Only one atom type for cobalt was used, Co, and so it is not shown.

**Table S3** Electrostatic and Lennard-Jones potentials.

| Atom name | Charge  | $\epsilon$ (kcal/mol) | $\sigma/2$ |
|-----------|---------|-----------------------|------------|
| Co        | 1.5780  | 0.00146124            | 1.08420    |
| o1        | -0.7651 | 0.08600               | 1.69983    |
| o3        | -0.8822 | 0.21000               | 1.47996    |
| c2        | 0.7173  | 0.17000               | 1.50001    |
| ca        | -0.2045 | 0.08600               | 1.69983    |
| cb        | 0.3048  | 0.08600               | 1.69983    |
| ha        | 0.2213  | 0.01570               | 1.23568    |

**Table S4** Bond potentials: Morse functions. The atom types are defined in Table S3.

| Type  | $D_e$      | $r_0(\text{\AA})$ | $\alpha(\text{\AA}^{-1})$ |
|-------|------------|-------------------|---------------------------|
| Co-o1 | 315.932903 | 1.998278          | 0.660894                  |
| Co-o3 | 362.942405 | 2.185981          | 0.662206                  |

**Table S5** Bond potentials: Harmonic functions. The atom types are defined in Table S3.

| Type  | $K_{ij}$ (kcal/mol Å <sup>2</sup> ) | $r_0$ (Å) |
|-------|-------------------------------------|-----------|
| c2-ca | 699.400024                          | 1.487000  |
| c2-o1 | 1296.000000                         | 1.214000  |
| o3-cb | 752.200012                          | 1.370000  |
| ca-cb | 823.400024                          | 1.434000  |
| ca-ca | 956.799988                          | 1.387000  |
| ca-ha | 688.599976                          | 1.087000  |

**Table S6** Angle potentials. The atom types are defined in Table S3.

| Type     | $K_{ijk}$ (kcal/mol rad <sup>2</sup> ) | $\theta$ (°) |
|----------|----------------------------------------|--------------|
| Co-o1-Co | 158.969306                             | 90.200136    |
| Co-o1-c2 | 100.750895                             | 128.137807   |
| Co-o3-cb | 91.5568840                             | 126.495318   |
| Co-o3-Co | 158.197039                             | 98.327439    |
| o1-Co-o3 | 60.0203710                             | 93.927311    |
| o1-Co-o1 | 166.601359                             | 90.952784    |
| o3-Co-o3 | 90.2478890                             | 164.138608   |
| ca-c2-o1 | 137.339996                             | 123.400002   |
| o1-c2-o1 | 156.339996                             | 130.300003   |
| o3-cb-ca | 139.639999                             | 115.099998   |
| c2-ca-cb | 139.639999                             | 115.099998   |
| c2-ca-ca | 129.279999                             | 120.099998   |
| ca-cb-ca | 127.879997                             | 117.500000   |
| ca-ca-ha | 96.919998                              | 120.000000   |
| ca-ca-cb | 131.979996                             | 120.099998   |
| cb-ca-ha | 98.139999                              | 120.699997   |

**Table S7** Dihedral potentials. The atom types are defined in Table S3.

| Type        | $K_{ijkl}$ (kcal/mol) | $\chi$ (°) | N |
|-------------|-----------------------|------------|---|
| Co-o1-Co-o3 | 6.944602              | 180.0000   | 0 |
| Co-o1-Co-o1 | 0.338875              | 180.0000   | 0 |
| Co-o1-c2-ca | 7.815491              | 180.0000   | 0 |
| Co-o1-c2-o1 | 4.222580              | 180.0000   | 0 |
| Co-o3-Co-o1 | 6.028692              | 180.0000   | 0 |
| Co-o3-Co-o3 | 6.068571              | 180.0000   | 0 |
| o1-Co-o3-cb | 0.068131              | 180.0000   | 0 |
| o1-Co-o1-c2 | 2.995051              | 180.0000   | 0 |
| o3-Co-o1-c2 | 1.377885              | 180.0000   | 0 |
| o3-Co-o3-cb | 4.022739              | 180.0000   | 0 |
| Co-o3-cb-ca | 1.050000              | 180.0000   | 2 |
| o1-c2-ca-cb | 1.000000              | 180.0000   | 2 |
| o1-c2-ca-ca | 1.000000              | 180.0000   | 2 |
| o3-cb-ca-c2 | 0.700000              | 180.0000   | 2 |
| o3-cb-ca-ca | 0.700000              | 180.0000   | 2 |
| o3-cb-ca-ha | 0.700000              | 180.0000   | 2 |
| c2-ca-cb-ca | 3.625000              | 180.0000   | 2 |
| c2-ca-ca-ha | 3.625000              | 180.0000   | 2 |
| c2-ca-ca-cb | 3.625000              | 180.0000   | 2 |
| ca-cb-ca-ca | 3.625000              | 180.0000   | 2 |
| ca-cb-ca-ha | 3.625000              | 180.0000   | 2 |
| cb-ca-ca-ha | 3.625000              | 180.0000   | 2 |
| cb-ca-ca-cb | 3.625000              | 180.0000   | 2 |
| ca-o1-c2-o1 | 1.100000              | 180.0000   | 0 |
| c2-ca-ca-cb | 1.100000              | 180.0000   | 0 |
| ca-ca-cb-o3 | 1.100000              | 180.0000   | 0 |
| ca-cb-ca-ha | 1.100000              | 180.0000   | 0 |

## 2.2 Water radial distribution functions

As mentioned in the main text, there is little variation in the water structure obtained from simulations with either a flexible or a rigid model of Co-MOF-74. This can be clearly seen in Figure S7 that shows the cobalt-water oxygen (Co-Ow) radial distribution functions calculated at four different loadings,  $N=18, 36, 54$ , and  $72$  using flexible (black) and rigid (red) frameworks.

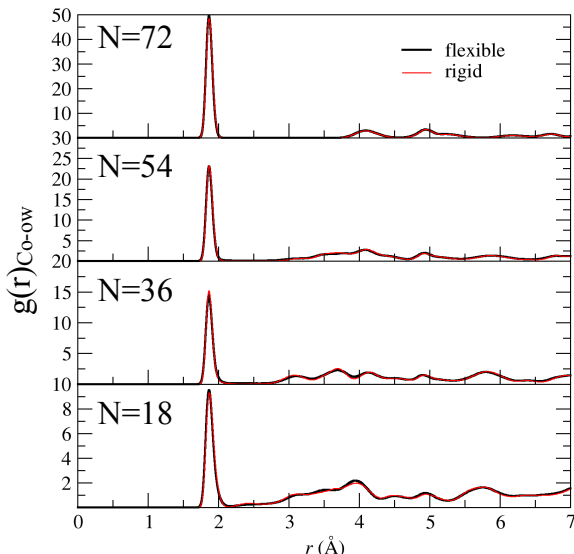

**Figure S7** Co-Ow radial distribution functions in the flexible (black) and rigid (red) Co-MOF-74 as a function of water molecules,  $N$ , per pore.

## 2.3 Water orientational dynamics

The reorientation decay of  $C_2(t)$  was fitted to a tri-exponential function to gain quantitative insights into the hydrogen bonding dynamics of water adsorbed in Co-MOF-74. While only the relevant  $\tau_2$  parameters are reported in the main text, all relaxation times are listed in Table S8 and S9.

**Table S8** Relaxation time constants,  $\tau_i$ , obtained from fits to orientational correlation functions  $C_2(t)$  calculated for water in flexible and rigid Co-MOF-74 as a function of number of  $H_2O$  molecules per pore.

| $N$ | $\tau_1^{flex}$ (ps) | $\tau_2^{flex}$ (ps) | $\tau_3^{flex}$ (ps) | $\tau_1^{rig}$ (ps) | $\tau_2^{rig}$ (ps) | $\tau_3^{rig}$ (ps) |
|-----|----------------------|----------------------|----------------------|---------------------|---------------------|---------------------|
| 18  | <0.01                | 0.08                 | 985                  | <0.01               | 2.35                | 617                 |
| 36  | <0.01                | 10.42                | 246                  | <0.01               | 11.97               | 318                 |
| 54  | <0.01                | 7.80                 | 1128                 | <0.01               | 12.22               | 3633                |
| 72  | <0.01                | 7.30                 | 412                  | <0.01               | 7.96                | 737                 |

**Table S9** Relaxation time constants,  $\tau_i$ , obtained from fits to orientational correlation functions  $C_2(t)$  calculated for water in rigid Co-MOF-74 as a function of number of  $H_2O$  molecules per pore.

| $N$ | $\tau_1^{flex}$ (ps) | $\tau_2^{flex}$ (ps) | $\tau_3^{flex}$ (ps) | $\tau_1^{rig}$ (ps) | $\tau_2^{rig}$ (ps) | $\tau_3^{rig}$ (ps) |
|-----|----------------------|----------------------|----------------------|---------------------|---------------------|---------------------|
| 36  | <0.01                | 13.43                | 283                  | <0.01               | 10.13               | 687                 |
| 54  | <0.01                | 10.41                | 273                  | <0.01               | 29.45               | 928                 |
| 72  | <0.01                | 7.49                 | 145                  | <0.01               | 10.79               | 425                 |

## References

- [1] P. D. C. Dietzel, Y. Morita, R. Blom and H. Fjellvåg, *Angew. Chem. Int. Ed.*, 2005, **44**, 6354–6358.
- [2] D. E. Goldberg, *Genetic Algorithms in Search, Optimization and Machine Learning*, Addison-Wesley Longman Publishing Co., Inc.: Boston, MA, U.S.A., 1st edn., 1989.
- [3] J. M. Wang, R. Wolf, J. Caldwell, P. Kollman and D. Case, *J. Comput. Chem.*, 2005, **25**, 1157–1174.
